# Supplementary material for: Age at Menarche and Risk of Cardiovascular Disease Outcomes: Findings From the National Heart Lung and Blood Institute‐Sponsored Women's Ischemia Syndrome Evaluation
Source: PubMed Central journal article supplement — J Am Heart Assoc. 2019 Jun 5;8(12):e012406. doi: 10.1161/JAHA.119.012406 (PMC6645646; doi:10.1161/jaha.119.012406), 2019-06-05

# **Supplemental Material**

**Table S1. Sex Hormone Levels by Age at Menarche Among Post-Menopausal women.**

|                                                                             | ≤10<br>years<br>(n=55)  | 11<br>years<br>(n=99)      | 12<br>years<br>(n=152)    | 13<br>years<br>(n=161)     | 14<br>years<br>(n=82)    | ≥15<br>years<br>(n=99)  | Overall<br>(n=648)       | P-<br>Value |
|-----------------------------------------------------------------------------|-------------------------|----------------------------|---------------------------|----------------------------|--------------------------|-------------------------|--------------------------|-------------|
| <b>Testosterone,<br/>median, (IQR)<br/>ng/dl, n=403</b>                     | 24.6<br>(15.9,<br>33.4) | 23.7<br>(17.7,<br>32.1)    | 25.4<br>(17,<br>33.7)     | 22.15<br>(15.1,<br>30.1)   | 24.5<br>(18.8,<br>32)    | 25.2<br>(17.9,<br>34.9) | 24.0<br>(17.1,<br>32.2)  | 0.52        |
| <b>Estradiol,<br/>median, (IQR)<br/>pg/ml, n=453</b>                        | 18 (11,<br>34)          | 18 (11,<br>39)             | 16 (8,<br>42)             | 16 (9.5,<br>28.5)          | 15 (9,<br>36)            | 15 (10,<br>33)          | 16 (10,<br>33)           | 0.89        |
| <b>Testosterone:<br/>Estradiol Ratio,<br/>median (IQR),<br/>n=400</b>       | 1.18<br>(0.7,<br>1.92)  | 1.25<br>(0.62,<br>2.18)    | 1.64<br>(0.69,<br>2.94)   | 1.51<br>(0.7,<br>2.57)     | 1.64<br>(0.54,<br>2.65)  | 1.57<br>(0.85,<br>2.64) | 1.5 (0.7,<br>2.64)       | 0.40        |
| <b>FSH*, median,<br/>(IQR) MLU/ml,<br/>n=453</b>                            | 30.4<br>(9.7,<br>52.2)  | 33.2<br>(18.6,<br>50.9)    | 37.9<br>(20.7,<br>54.6)   | 40.95<br>(22.35,<br>57.65) | 40.9<br>(23.4,<br>60.15) | 41.1<br>(21.4,<br>57.6) | 37.2<br>(21.2,<br>55.7)  | 0.57        |
| <b>LH<sup>†</sup>, median<br/>(IQR) MLU/ml,<br/>n=452</b>                   | 12 (3.6,<br>18.7)       | 12.8<br>(6.5,<br>19.1)     | 14.35<br>(8.2,<br>22.5)   | 15.1<br>(8.4,<br>23.8)     | 14 (9.9,<br>19.15)       | 17.1<br>(9.2,<br>21.1)  | 14.5<br>(8.4,<br>21.55)  | 0.40        |
| <b>Sex Hormone<br/>Binding Globulin<br/>(SHBG), median<br/>(IQR), n=403</b> | 38.1<br>(28.2,<br>65.4) | 46.6<br>(23.55,<br>70.85)  | 51.3<br>(34.5,<br>90.8)   | 45.5<br>(31.5,<br>82.6)    | 49.5<br>(34.9,<br>84.7)  | 40.9<br>(25.8,<br>76)   | 46<br>(29.5,<br>82.6)    | 0.14        |
| <b>Androstenedione,<br/>median (IQR)<br/>pg/ml, n=403</b>                   | 560<br>(407,<br>802)    | 487.5<br>(339.5,<br>777.5) | 456<br>(315,<br>716)      | 479<br>(302,<br>699)       | 555<br>(309,<br>677)     | 579.5<br>(416,<br>861)  | 519<br>(327,<br>732)     | 0.37        |
| <b>DHEA-S<sup>‡</sup>,<br/>median (IQR)<br/>µg/dl, n=382</b>                | 46.2<br>(29,<br>65.4)   | 38.9<br>(22.35,<br>69.8)   | 36.85<br>(20.6,<br>63.25) | 34.8<br>(15.6,<br>61.3)    | 36.4<br>(20.6,<br>65.5)  | 36.9<br>(15.2,<br>81.7) | 37.55<br>(19.3,<br>65.5) | 0.59        |

\*Follicle stimulating hormone <sup>†</sup>Luteinizing hormone <sup>‡</sup>Dehydroepiandrosterone sulfate

**Table S2. Models with TET and sTET for time to CVD event.**

| HR's for time to CVD event      | HR (95% CI) for model with TET | HR (95% CI) for model with sTET | HR (95% CI) for model without TET or sTET |
|---------------------------------|--------------------------------|---------------------------------|-------------------------------------------|
| Age at menarche $\leq 10$ vs 12 | 4.21 (1.90, 9.30)              | 4.03 (1.83, 8.87)               | 4.0 (1.84, 8.69)                          |
| Age at menarche 11 vs 12        | 2.27 (1.09, 4.75)              | 2.24 (1.07, 4.67)               | 2.14 (1.04, 4.40)                         |
| Age at menarche 13 vs 12        | 1.95 (0.97, 3.92)              | 1.88 (0.93, 3.79)               | 1.80 (0.91, 3.55)                         |
| Age at menarche 14 vs 12        | 2.74 (1.21, 6.20)              | 2.69 (1.18, 6.09)               | 2.25 (1.02, 4.97)                         |
| Age at menarche $\geq 15$ vs 12 | 2.52 (1.14, 5.57)              | 2.32 (1.04, 5.18)               | 2.53 (1.18, 5.42)                         |
| age                             | 1.03 (1.003, 1.05)             | 1.03 (1.01, 1.05)               | 1.02 (1.003, 1.04)                        |
| BMI                             | 0.98 (0.95, 1.02)              | 0.98 (0.95, 1.02)               | 0.98 (0.94, 1.01)                         |
| Diabetes No vs Yes              | 0.38 (0.24, 0.61)              | 0.39 (0.25, 0.63)               | 0.41 (0.26, 0.64)                         |
| Ever smoker No vs Yes           | 0.45 (0.28, 0.70)              | 0.42 (0.27, 0.67)               | 0.49 (0.32, 0.76)                         |
| Dyslipidemia No vs Yes          | 0.63 (0.39, 1.02)              | 0.61 (0.37, 0.98)               | 0.62 (0.39, 0.99)                         |
| Hypertension No vs Yes          | 0.57 (0.35, 0.94)              | 0.56 (0.34, 0.93)               | 0.57 (0.35, 0.93)                         |
| logSAA                          | 1.26 (1.05, 1.52)              | 1.27 (1.05, 1.53)               | 1.26 (1.05, 1.52)                         |
| TET/sTET/-                      | 0.99 (0.97, 1.02)              | 0.98 (0.95, 1.01)               | -                                         |

**Table S3. Models with TET and sTET for time to death.**

| HR's for time to death          | HR (95% CI) for model with TET | HR (95% CI) for model with sTET | HR (95% CI) for model without TET |
|---------------------------------|--------------------------------|---------------------------------|-----------------------------------|
| Age at menarche $\leq 10$ vs 12 | 3.67 (1.38, 9.72)              | 3.41 (1.29, 9.05)               | 3.42 (1.32, 8.87)                 |
| Age at menarche 11 vs 12        | 2.62 (1.12, 6.11)              | 2.51 (1.08, 5.84)               | 2.42 (1.06, 5.49)                 |
| Age at menarche 13 vs 12        | 1.32 (0.58, 3.02)              | 1.26 (0.55, 2.89)               | 1.23 (0.55, 2.74)                 |
| Age at menarche 14 vs 12        | 2.54 (0.97, 6.66)              | 2.46 (0.94, 6.48)               | 2.30 (0.91, 5.82)                 |
| Age at menarche $\geq 15$ vs 12 | 2.63 (1.11, 6.26)              | 2.43 (1.02, 5.83)               | 2.43 (1.05, 5.61)                 |
| age                             | 1.03 (1.01, 1.06)              | 1.03 (1.01, 1.05)               | 1.03 (1.01, 1.05)                 |
| BMI                             | 0.92 (0.88, 0.97)              | 0.92 (0.88, 0.97)               | 0.92 (0.88, 0.97)                 |
| Diabetes No vs Yes              | 0.35 (0.21, 0.59)              | 0.36 (0.22, 0.60)               | 0.36 (0.22, 0.59)                 |
| Ever smoker No vs Yes           | 0.67 (0.41, 1.09)              | 0.64 (0.39, 1.05)               | 0.68 (0.42, 1.11)                 |
| Dyslipidemia No vs Yes          | 0.64 (0.37, 1.11)              | 0.64 (0.37, 1.10)               | 0.65 (0.38, 1.11)                 |
| Hypertension No vs Yes          | 0.28 (0.15, 0.53)              | 0.28 (0.15, 0.53)               | 0.28 (0.15, 0.52)                 |
| logSAA                          | 1.31 (1.05, 1.63)              | 1.31 (1.05, 1.64)               | 1.31 (1.05, 1.63)                 |
| TET/sTET/-                      | 0.99 (0.96, 1.02)              | 0.98 (0.95, 1.01)               | -                                 |

**Figure S1. Adjusted relative hazard (with sTET) and 95% confidence interval (CI) of major adverse cardiac events (MACE) by age at menarche.**

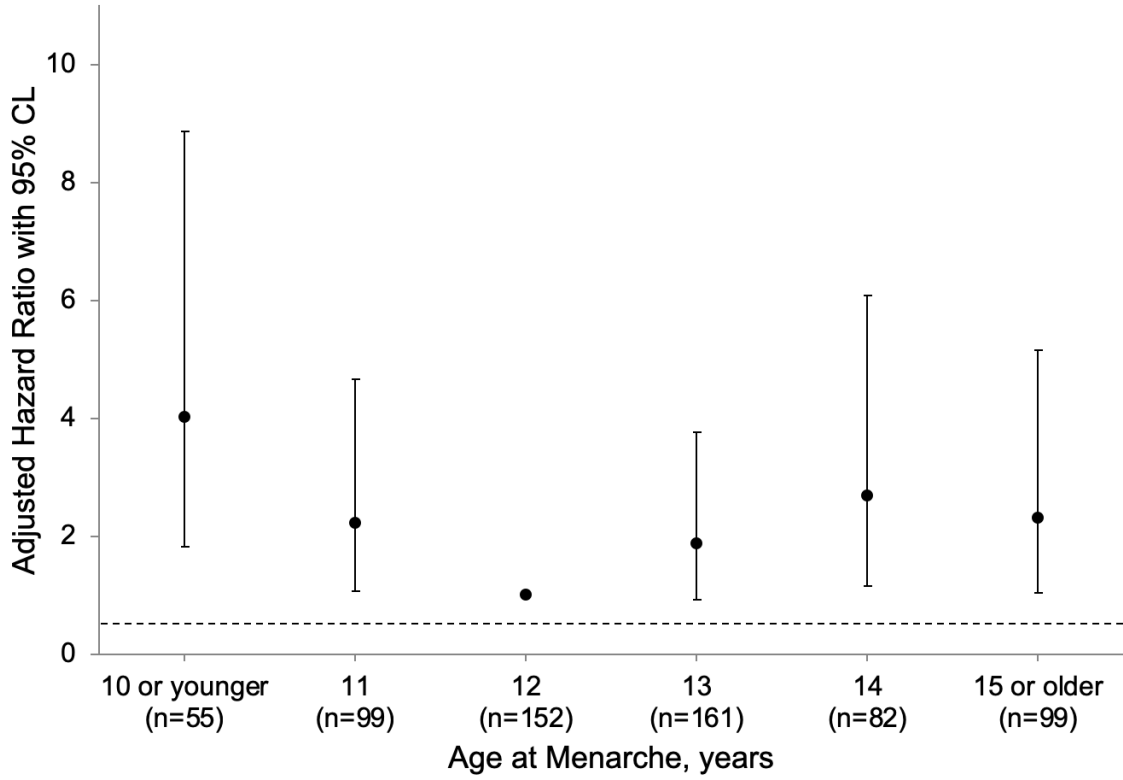

**Figure S2. Adjusted relative hazard (with sTET) and 95% confidence interval (CI) of mortality by age at menarche.**

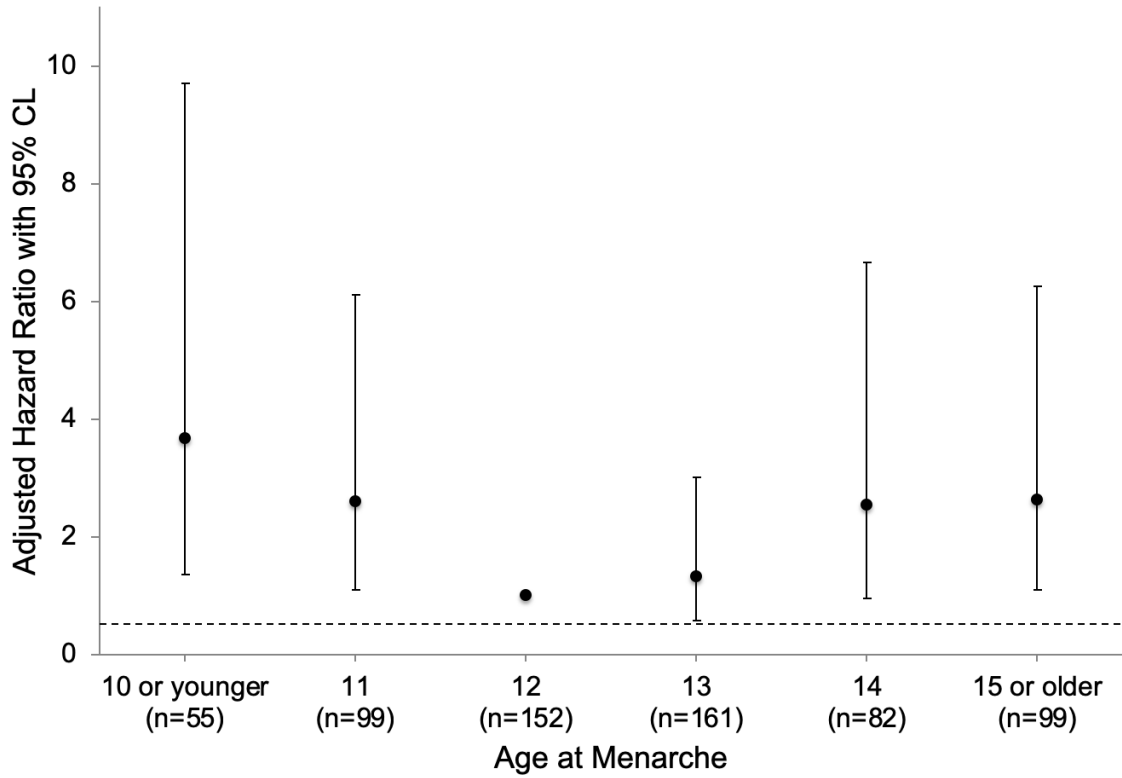

Supplement: JAH3-8-e012406-s001.pdf [file JAH3-8-e012406-s001.pdf]
